# Supplementary material
Source: publisher site journal article supplement (https://www.dovepress.com/article/468332)
Supplement: Supplementary file 1 [file get_supplementary_file.php]

**Supplementary Figure 1** An example of the user interface from the Easy to Recover WeChat Mini-program.


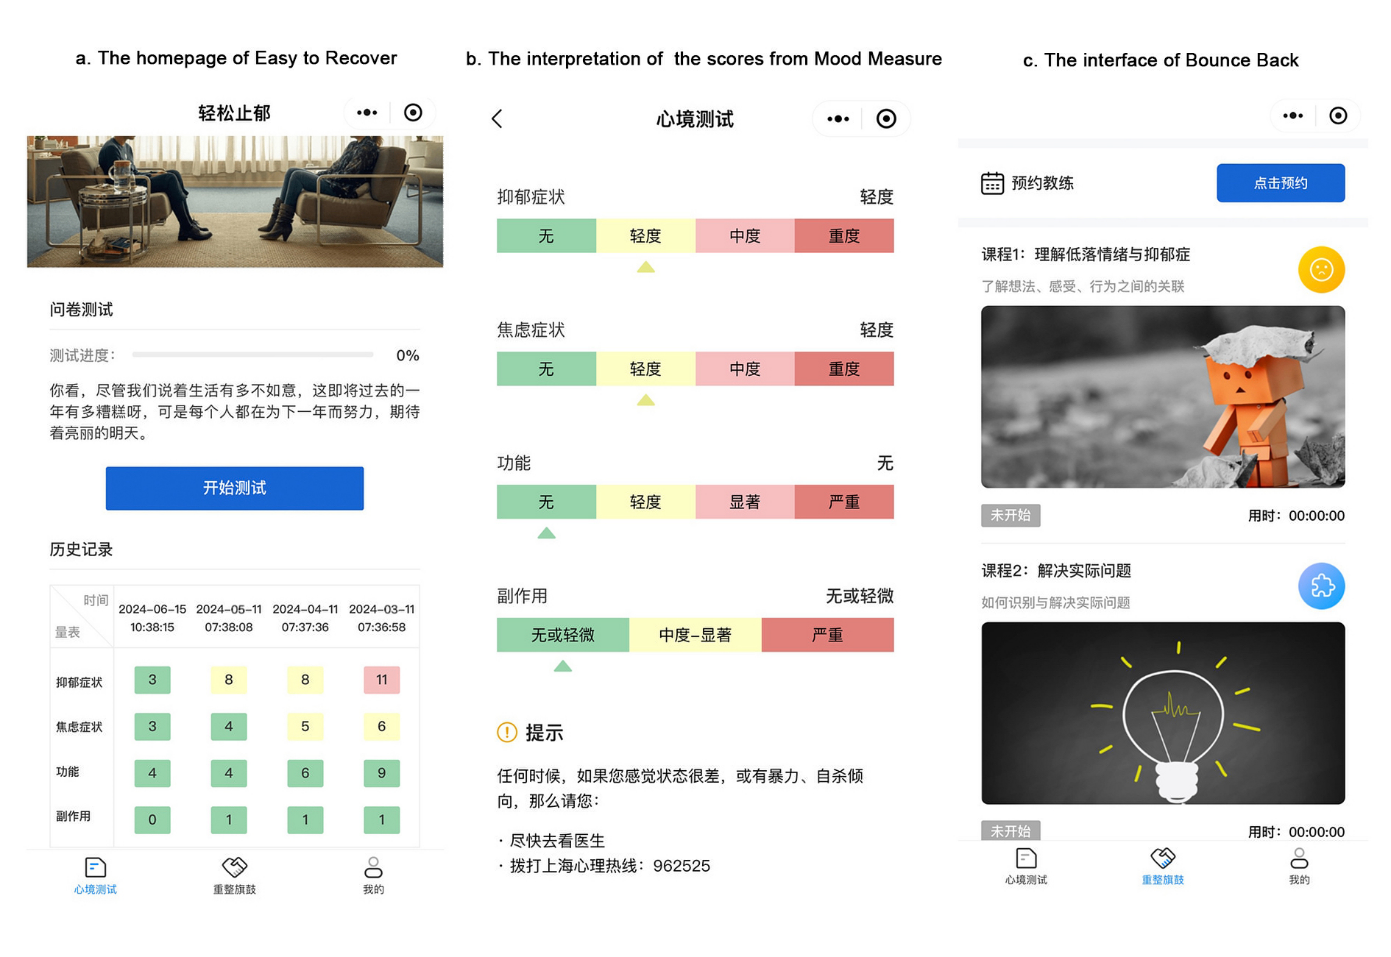


**Supplementary Figure 2** The PHQ-9 reduction rate at 2-month between enhanced Measurement-based Care (eMBC) group and Measurement-based Care (MBC) group.





**Supplementary Figure 3** The relationship between the frequency of scale completion on Easy to Recover and Quality of life-6 (QOL-6) reduction rate at 2-month in eMBC group
